# Supplementary material for: Enzymatically synthesised MnO2 nanoparticles for efficient near-infrared photothermal therapy and dual-responsive magnetic resonance imaging
Source: Royal Society of Chemistry journal article supplement (doi:10.1039/d1nr02400k), 2021-01-01
Supplement: d1nr02400k1.pdf [file d1nr02400k1.pdf]

## Supporting Information

### **Enzymatically synthesised MnO<sub>2</sub> nanoparticles for highly efficient near-infrared photothermal therapy and dual-responsive magnetic resonance imaging**

#### *Protein expression and purification*

The harvested cells were suspended in equilibration buffer (100 mM Tris-HCl, pH = 8.0; 1.5 M NaCl) supplemented with 10 mM CaCl<sub>2</sub>, 1 mM CuSO<sub>4</sub>, and EDTA-free protease inhibitor (Sigma) and lysed using JY92-IID (Ningbo Dongnan Instrument Co., Ltd., China) for 1 min/ml cell lysate at 60% amplitude with 10-s on/off pulses on ice. The crude extract was clarified by 20 min of incubation at 70 °C. The debris was pelleted by centrifugation at 15,000 × g at 4 °C for 30 min, and the supernatant was filtered through a 0.4-µm-pore PVDF filter. The clarified lysate was then added to a 5-ml column volume (CV) of gravity flow Strep-Tactin@XT superflow® (IBA, Germany). The column was washed 5 × with 1 CV of buffer W (100 mM Tris/HCl, pH = 8.0; 150 mM NaCl; 1 mM EDTA), the wash fractions were collected, and 10 µl of the wash fraction was saved for analytical SDS-PAGE. Then, 6 × 0.5 CV of buffer BXT (100 mM Tris/HCl, pH = 8.0; 150 mM NaCl; 1 mM EDTA; 50 mM biotin) was added to obtain a high protein concentration in one fraction, followed by the addition of 0.6 CV as elution fraction 1 (E1), then 1.6 CV (E2) and finally 0.8 CV (E3). The main protein content should be in E2. A 10-µl sample of E2 can be used for SDS-PAGE analysis. All buffers up to this point were supplemented with 50 µM CuSO<sub>4</sub> to

avoid copper leaching by Tris. This as-isolated MnxEFG was then flash frozen in liquid nitrogen and stored at  $-80\text{ }^{\circ}\text{C}$  until use. The protein was quantified by the Thermo Scientific Pierce bicinchoninic acid (BCA) protein assay.

### ***Content of protein in Bio-MnO<sub>2</sub> NPs***

The concentration of protein in Bio-MnO<sub>2</sub> NPs was determined as follows: 100  $\mu\text{L}$  of Bio-MnO<sub>2</sub> NPs (final concentration was  $150\text{ }\mu\text{g mL}^{-1}$ ) was reacted with 10 mM GSH for 24 h. The protein in the product after Bio-MnO<sub>2</sub> NP decomposition was quantified by the Thermo Scientific Pierce bicinchoninic acid (BCA) protein assay, which was determined to be  $7.5\text{ }\mu\text{g mL}^{-1}$ , and thus, the content of protein in Bio-MnO<sub>2</sub> NPs was 5%.

### ***Calculation of the photothermal conversion efficiency***

According to a previous report[1], the photothermal conversion efficiency ( $\eta$ ) was calculated via equation 1:

$$\eta = \frac{hS(T_{\max} - T_{\text{surr}}) - Q_s}{I(1 - 10^{-A})} \quad (\text{Eq 1})$$

where  $h$  is the heat transfer coefficient,  $S$  represents the surface area of the cell,  $T_{\max}$  is the maximum steady-state temperature,  $T_{\text{surr}}$  is the ambient temperature of the surroundings,  $Q_s$  is the heat dissipated from light absorbed by the cell itself, which is measured independently to be 0.27 mW,  $I$  is the laser power (the area of the well was  $3.14 \times (0.5)^2 = 0.785\text{ cm}^2$ , the power density was  $1.5\text{ W/cm}^2$ , and the laser power was  $0.785 \times 1.5 \times 1000 = 1177.5\text{ mW}$ ), and  $A$  is the absorbance of Bio-MnO<sub>2</sub> NPs at an

excitation wavelength of 808 nm, which was calculated to be 0.303 (Figure 3d).

We define  $\theta$  as the following:

$$\theta = \frac{T - T_{surr}}{T_{max} - T_{surr}} \quad (\text{Eq 2})$$

where  $(T - T_{surr})$  represents the temperature increase compared to the surroundings, and  $(T_{max} - T_{surr})$  represents the temperature change at the maximum steady-state temperature.

$$\tau_s = -\frac{t}{\ln \theta} \quad (\text{Eq 3})$$

$\tau_s$  is the sample system time constant, which can be determined to be 157 s by the linear curve fitting of the temperature cooling time according to Figure 3f.

$$hS = \frac{m_s C_s}{\tau_s} \quad (\text{Eq 4})$$

where  $m_s$  (0.2 g) and  $C_s$  (4.2 J g<sup>-1</sup>) are the mass and heat capacity of the solvent, respectively. Putting this value into equation (4), the final photothermal conversion efficiency ( $\eta$ ) of Bio-MnO<sub>2</sub> NPs can be calculated to be 44%.

The photothermal conversion efficiency ( $\eta$ ) of Chem-MnO<sub>2</sub> was calculated according to the same method. The mean absorbance at 808 nm and  $\tau_s$  of Chem-MnO<sub>2</sub> was determined to be 0.3724 and 257 s, respectively. The final photothermal conversion efficiency ( $\eta$ ) of Chem-MnO<sub>2</sub> was calculated to be 27.9%.

## References

- [1] Roper, D. K.; Ahn, W.; Hoepfner, M. Microscale Heat Transfer Transduced

by Surface Plasmon Resonant Gold Nanoparticles. *J. Phys. Chem. C Nanomater. Interfaces* **2007**, *111*, 3636–3641.

Table S1. Surface elemental composition of Bio-MnO<sub>2</sub> NPs analysed by dot-scan EDS.

| Element | Family | Atomic Fraction (%) | Mass Fraction (%) |
|---------|--------|---------------------|-------------------|
| C       | K      | 80.51               | 66.93             |
| N       | K      | 2.34                | 2.17              |
| O       | K      | 7.37                | 8.11              |
| Na      | K      | 0.04                | 0.06              |
| P       | K      | 1.03                | 1.91              |
| K       | K      | 0.96                | 2.24              |
| Mn      | K      | 5.74                | 18.58             |

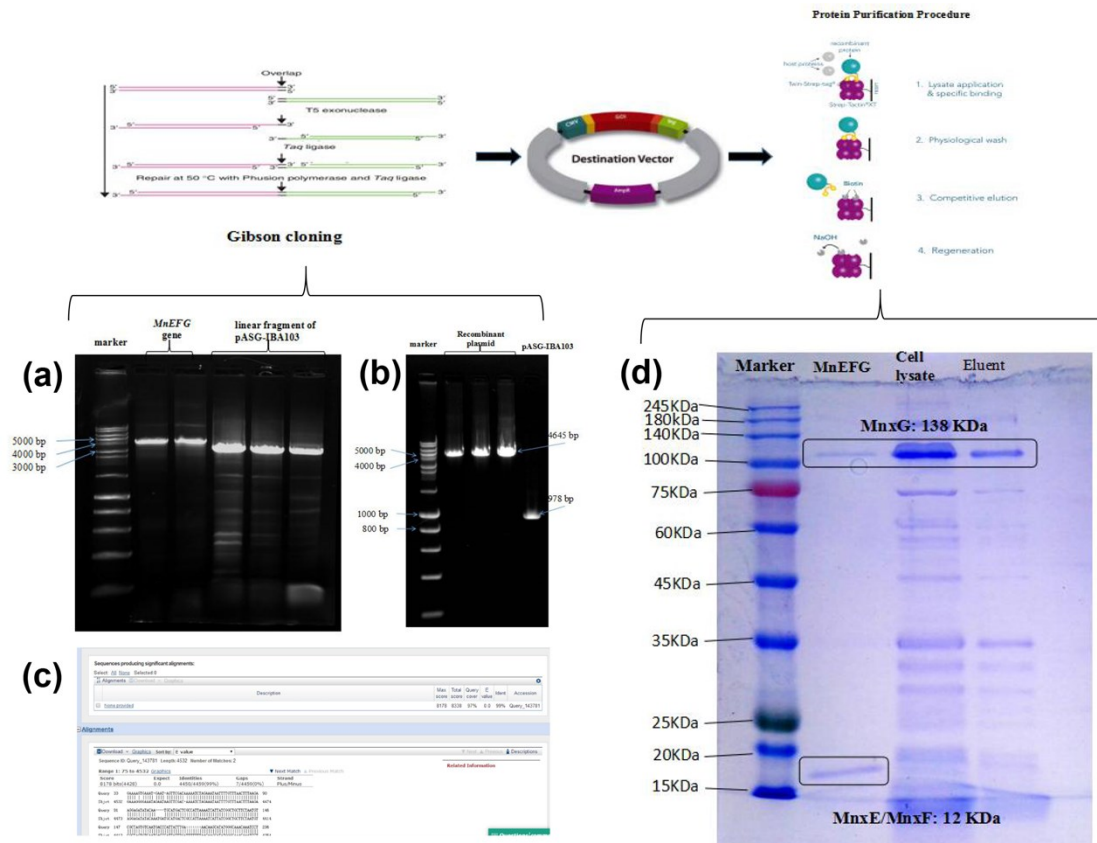

**Figure S1** (a) PCR amplification of *mnxEFG* gene fragments with homologous sequences from the vector pASG-IBA103 and linearization of pASG-IBA103 by PCR. (b) PCR amplification of the recombinant plasmid and the acceptor plasmid pASG-IBA103 (control) using sequencing primers. (c) BLAST results between the insert fragment and the *mnxEFG* gene. (d) SDS-PAGE results of purified protein.

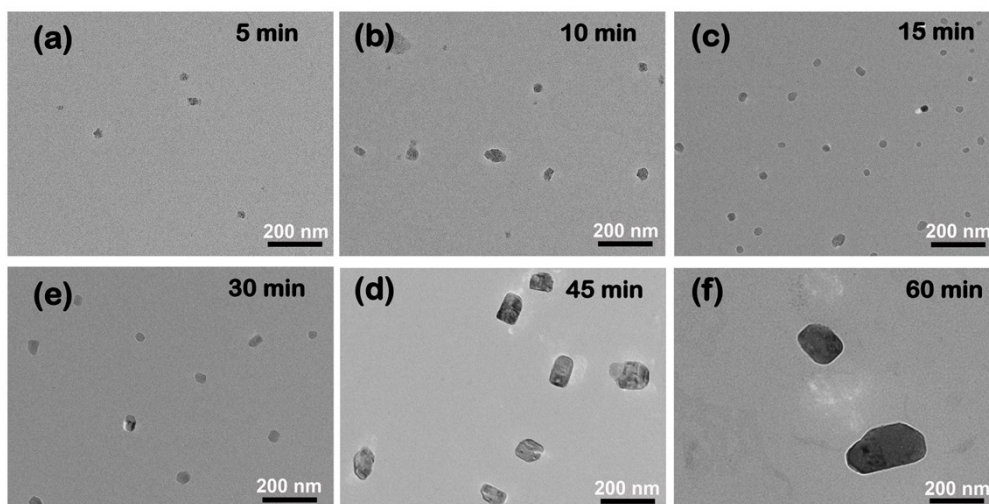

**Figure S2** TEM images of Bio-MnO<sub>2</sub> NPs formed by the biomineralization of Mnx at 30 °C for different time periods.

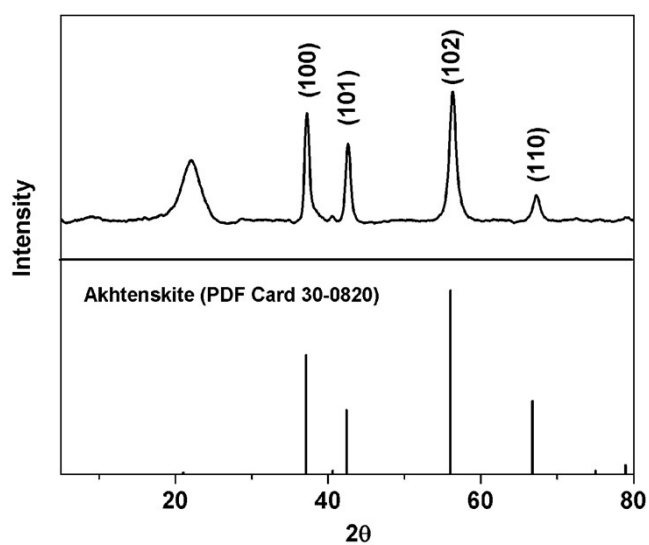

**Figure S3** XRD profile of Chem-MnO<sub>2</sub>.

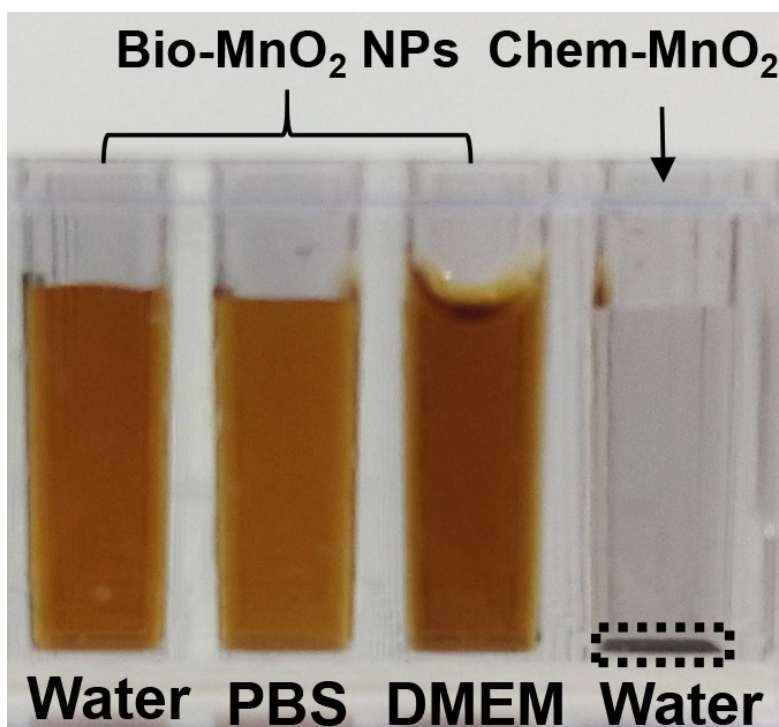

**Figure S4** Photos of Bio-MnO<sub>2</sub> NPs dispersed in deionized water, PBS and DMEM for 9 days and Chem-MnO<sub>2</sub> dispersed in deionized water for 1 h.

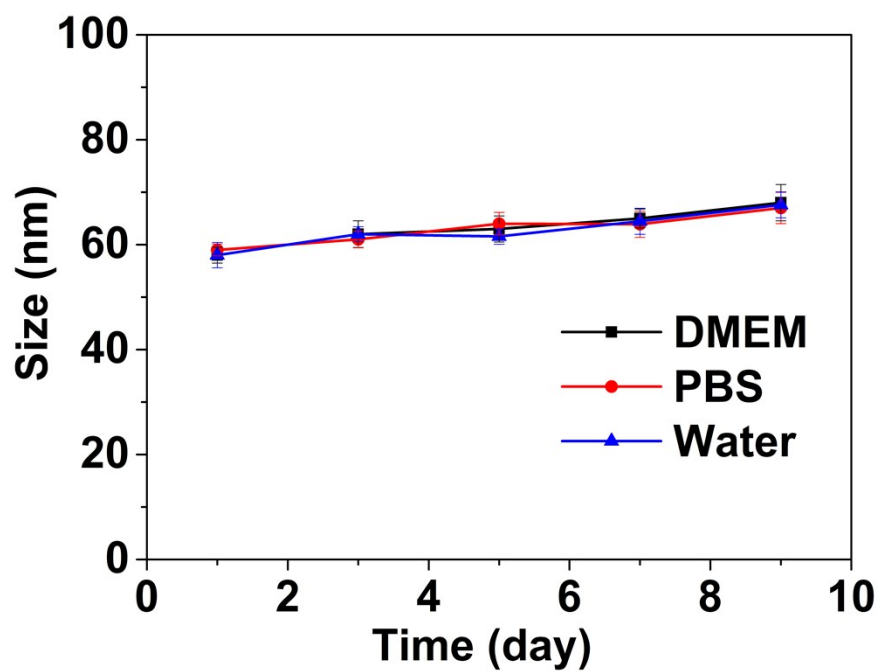

**Figure S5** Hydrodynamic diameter of Bio-MnO<sub>2</sub> NPs as a function of incubation time.



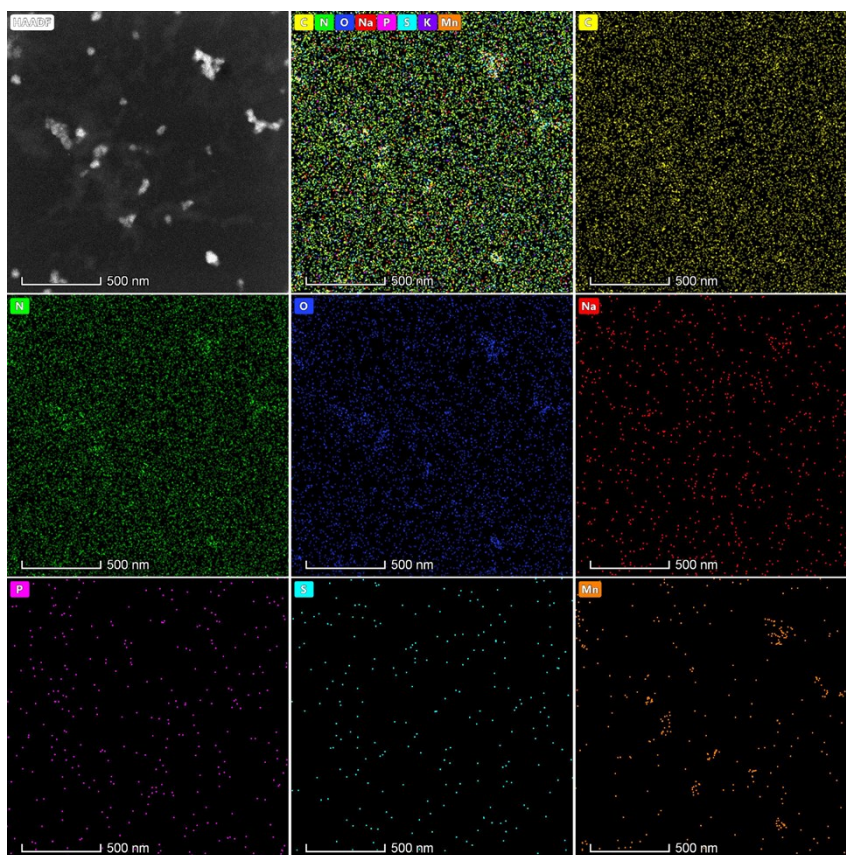

**Figure S6** EDS maps of Bio-MnO<sub>2</sub> NPs (30 min).

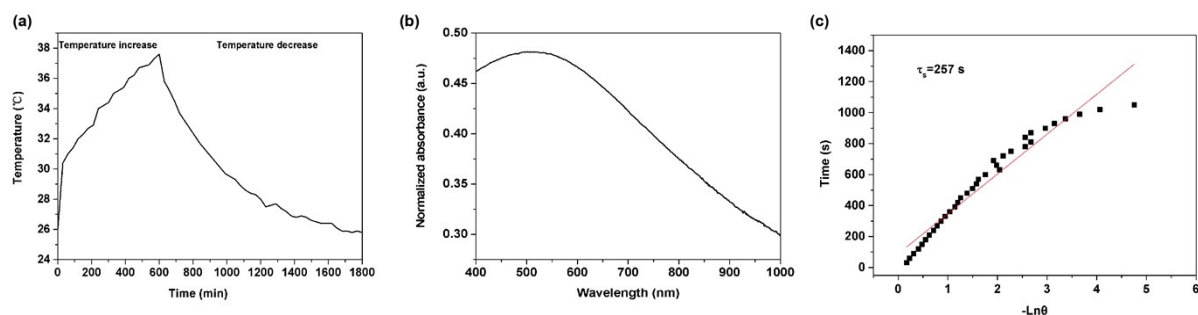

**Figure S7** (a) Photothermal profile of Chem-MnO<sub>2</sub> (150 µg mL<sup>-1</sup>) upon exposure to an 808-nm laser at 1.5 W cm<sup>-2</sup> for 10 min, after which the laser was shut off. (b) UV-vis-NIR spectra of Chem-MnO<sub>2</sub>. (c) Time constant for heat transfer from the system ( $\tau_s = 257$  s) obtained by applying the linear time data from the cooling stage (1200 s)



versus the negative natural logarithm of the driving force temperature.

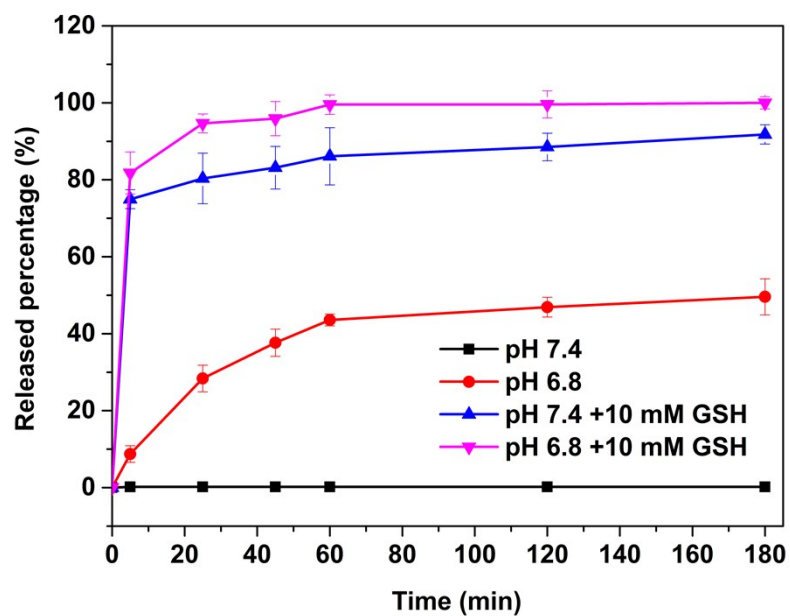

**Figure S8** Percentage of Mn<sup>2+</sup> released from Bio-MnO<sub>2</sub> NPs (150 μg mL<sup>-1</sup>) as a function of incubation duration.

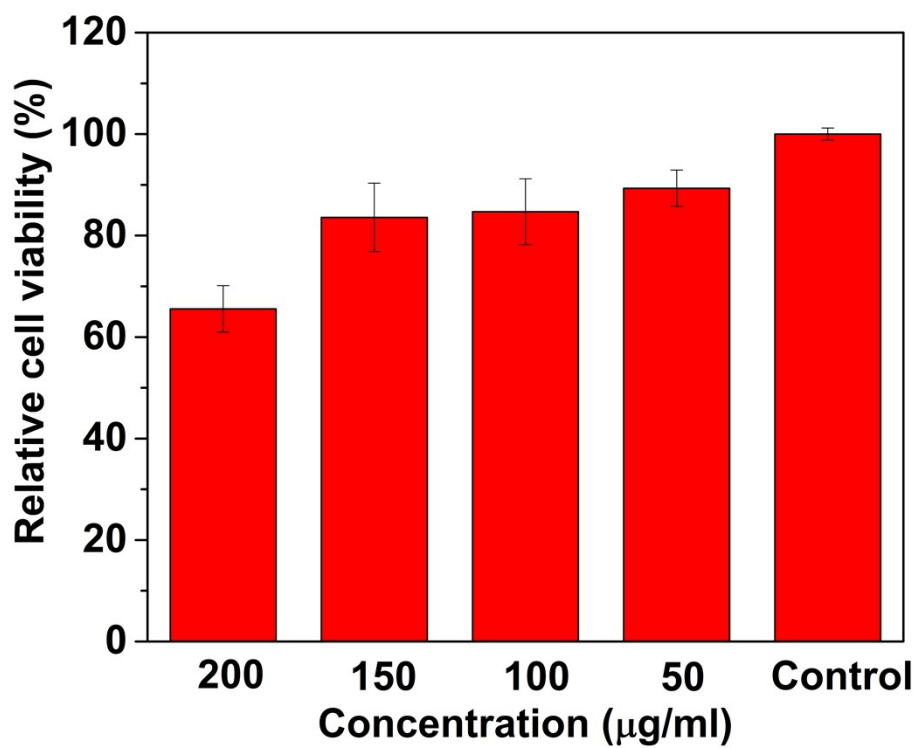

**Figure S9** Relative viability of 4T1 cells after incubation with Chem-MnO<sub>2</sub> NPs for 24 h at different concentrations.

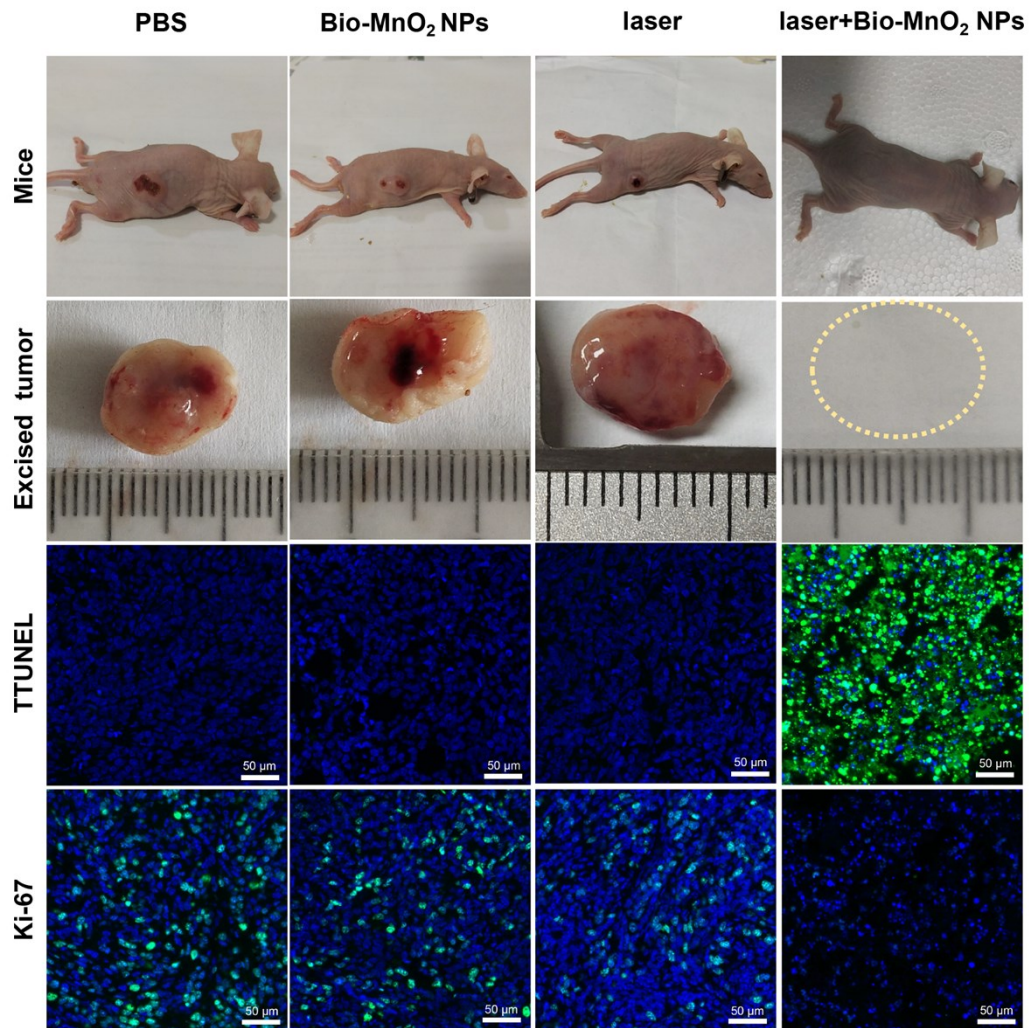

**Figure S10** Photographs of representative mice after different treatments (16 days after the first treatment), excised 4T1 tumours from tumour-bearing mice and the results of TUNEL and antigen Ki-67 immunofluorescence staining of tumour tissues.
